# Supplementary material for: Low survival rate and muscle fiber-dependent aging effects in the McArdle disease mouse model
Source: PubMed Central journal article supplement (PMC6435661; doi:10.1038/s41598-019-41414-8), 2019-03-26
Supplement: 41598_2019_41414_MOESM1_ESM.pdf [file 41598_2019_41414_MOESM1_ESM.pdf]

**Low survival rate and muscle fiber-dependent aging effects in the  
McArdle disease mouse model**

Real-Martinez A<sup>1#</sup>, Brull A<sup>2#</sup>, Huerta J<sup>1</sup>, Tarrasó G<sup>1</sup>, Lucia A<sup>3,4,5</sup>, Martin MA<sup>4,5</sup>, Arenas  
J<sup>4,5</sup>, Andreu AL<sup>1,5</sup>, Nogales-Gadea G<sup>5,6</sup>, Vissing J<sup>7</sup>, Krag TO<sup>7</sup>, de Luna N<sup>8,5#</sup> and Pinós  
T<sup>1,5#\*</sup>

**SUPPLEMENTARY FILES**

EDL 8 weeks

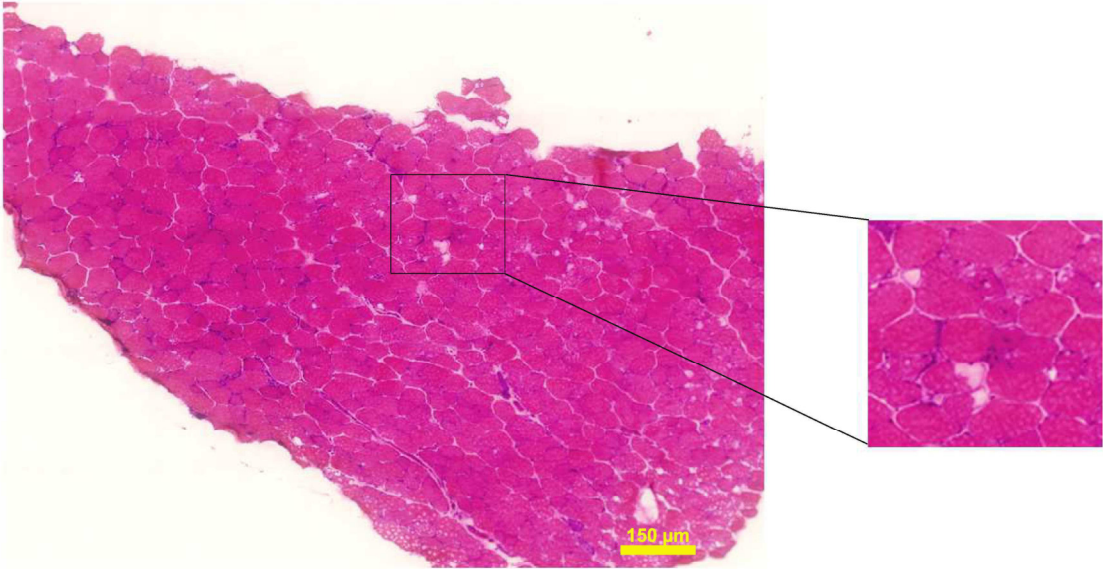

EDL 35 weeks

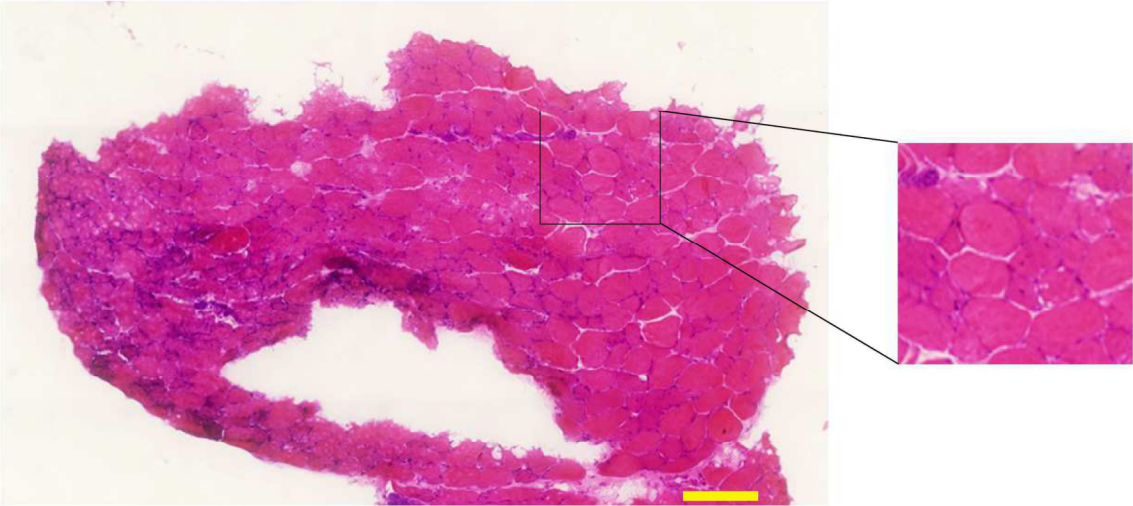

EDL 70 weeks

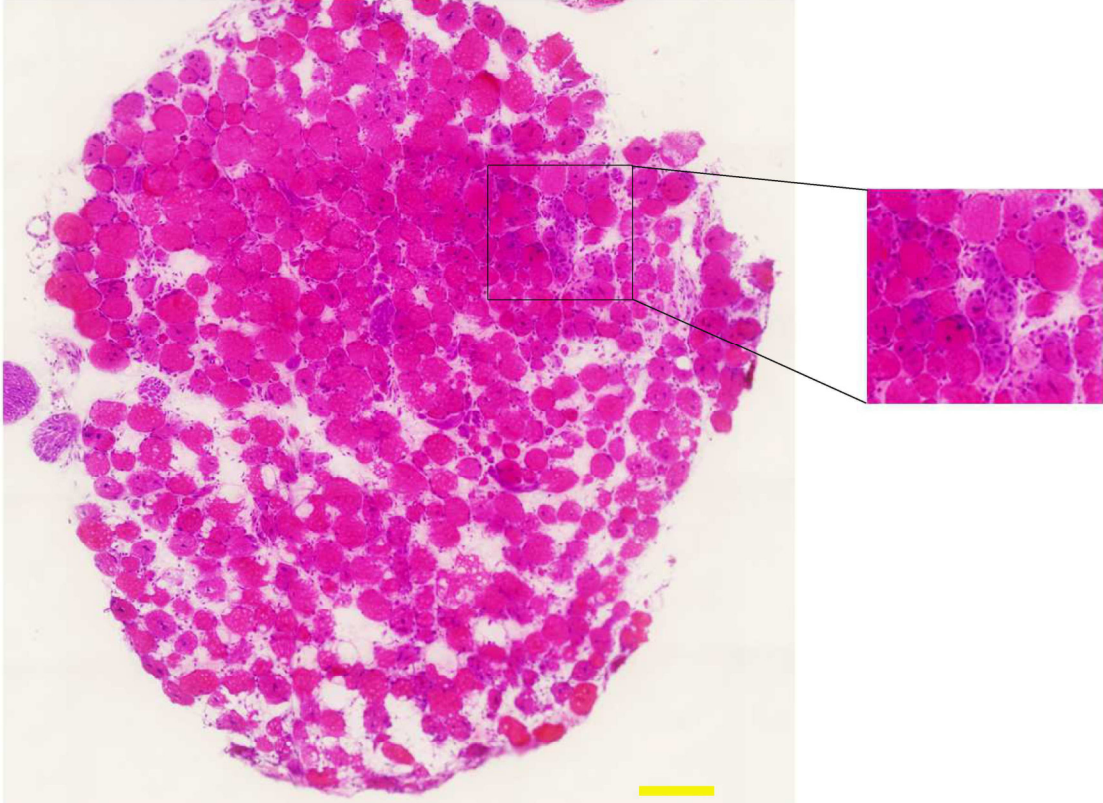

# Supp. Fig 2

## A

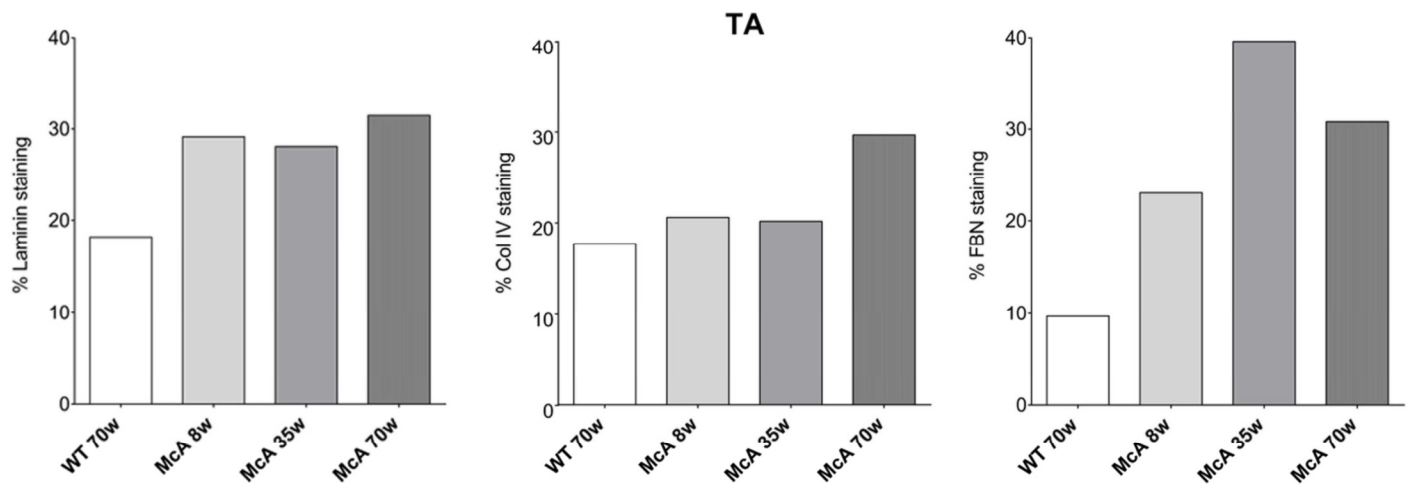

## B

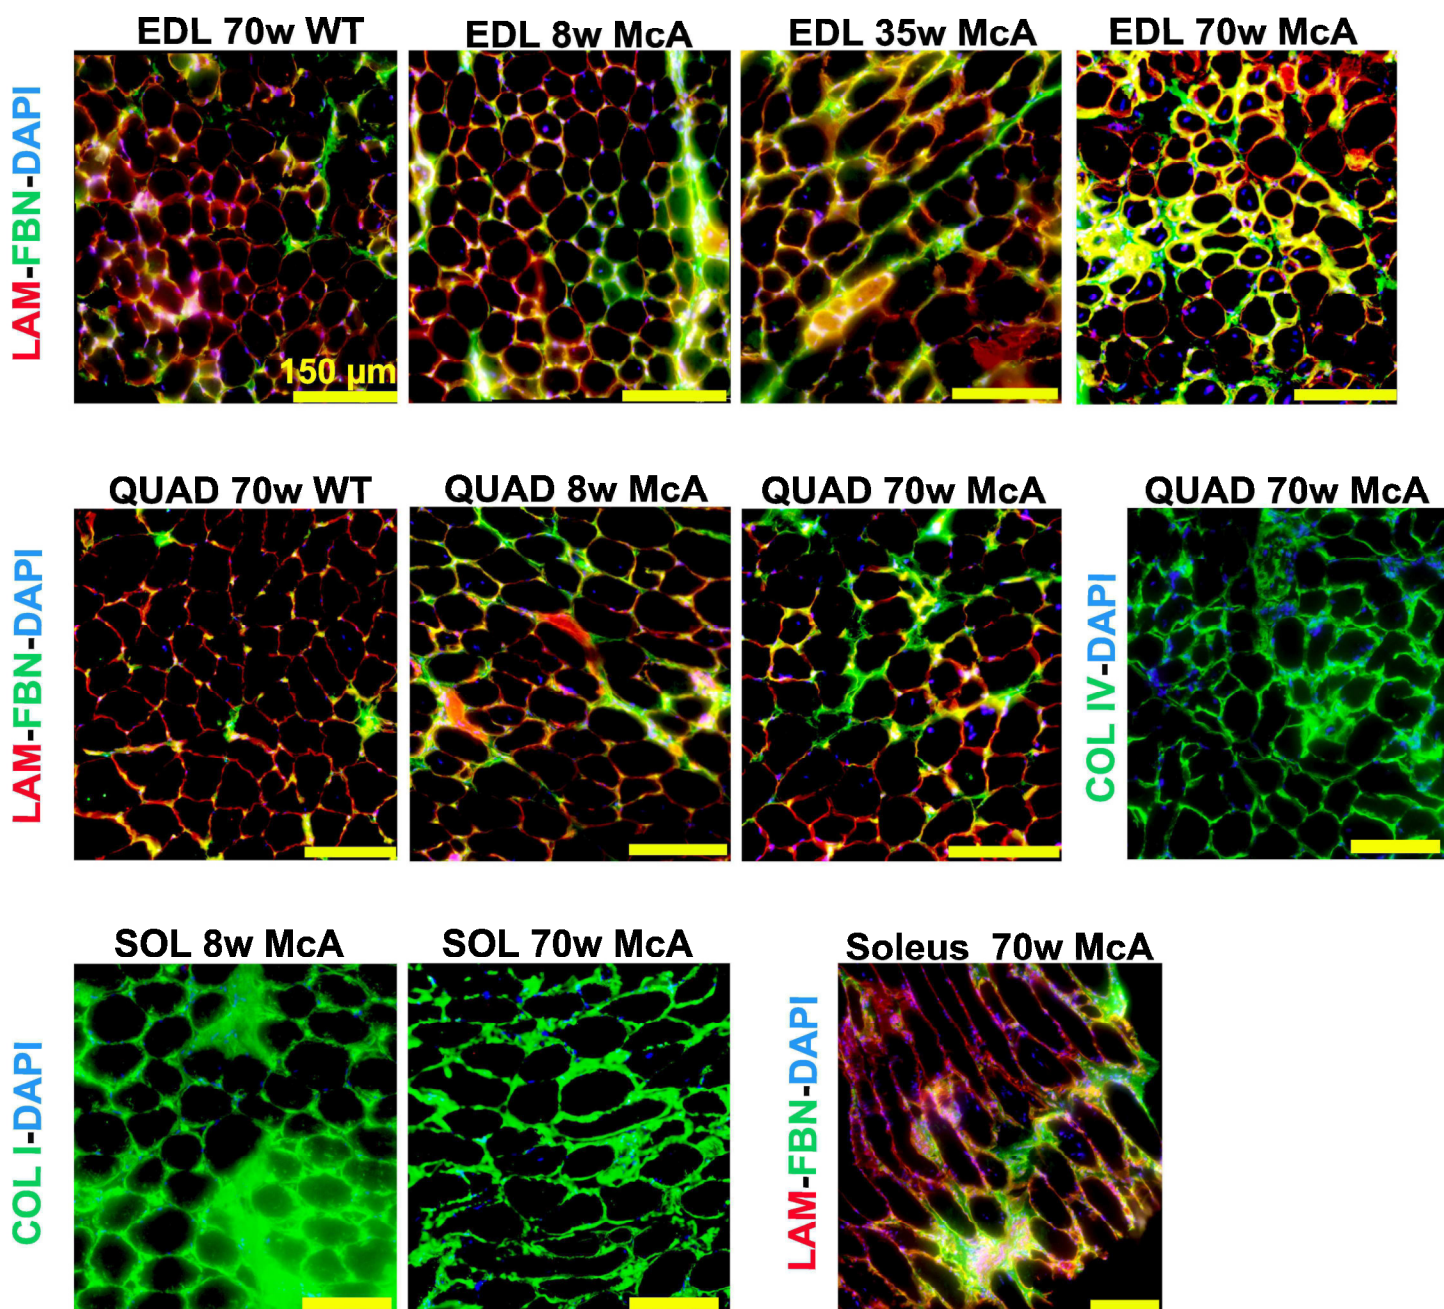

Supp. Fig 3

**Soleus**

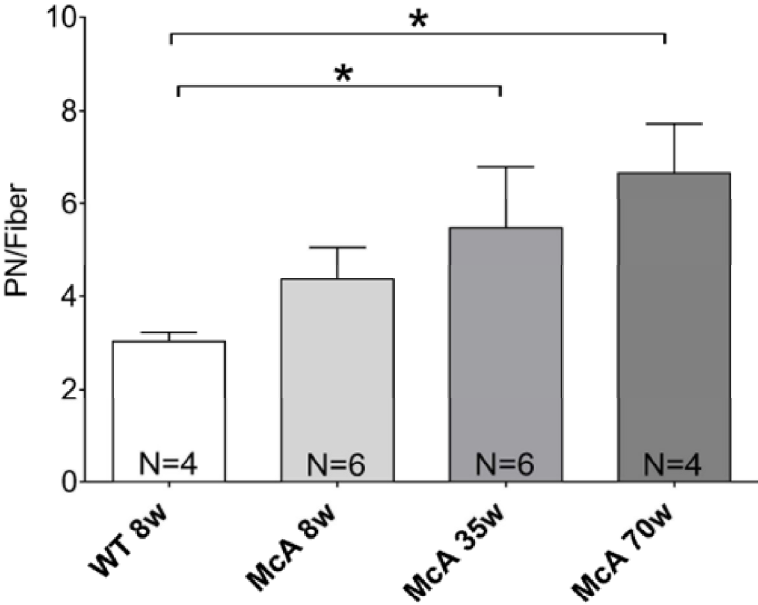

**TA**

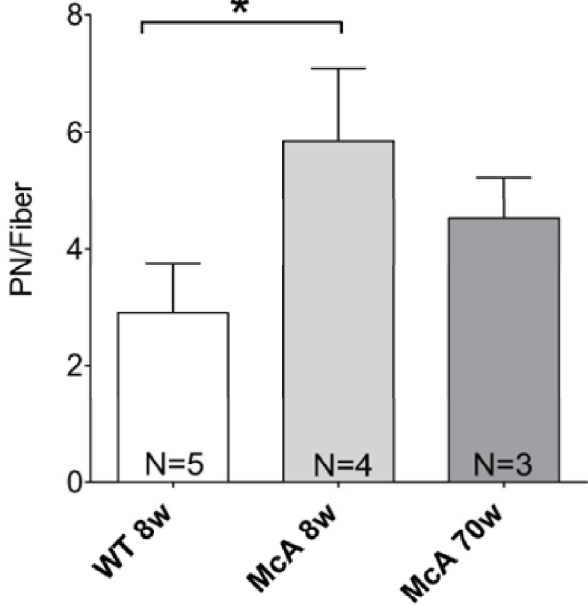

# Soleus

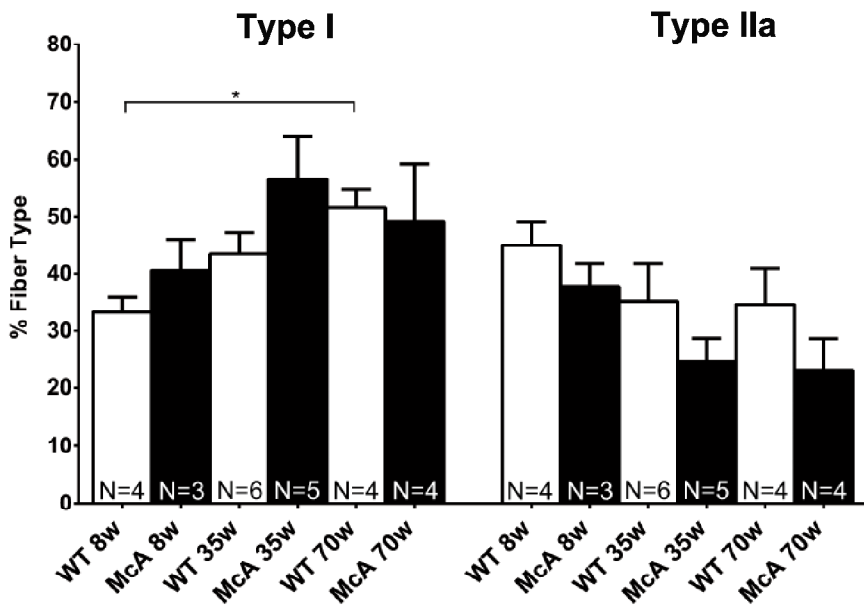

# EDL

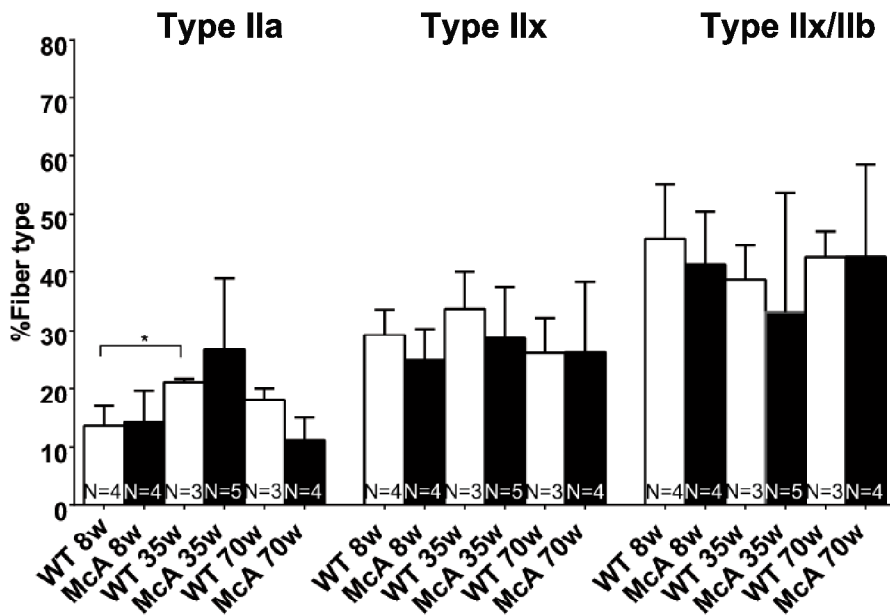

# TA

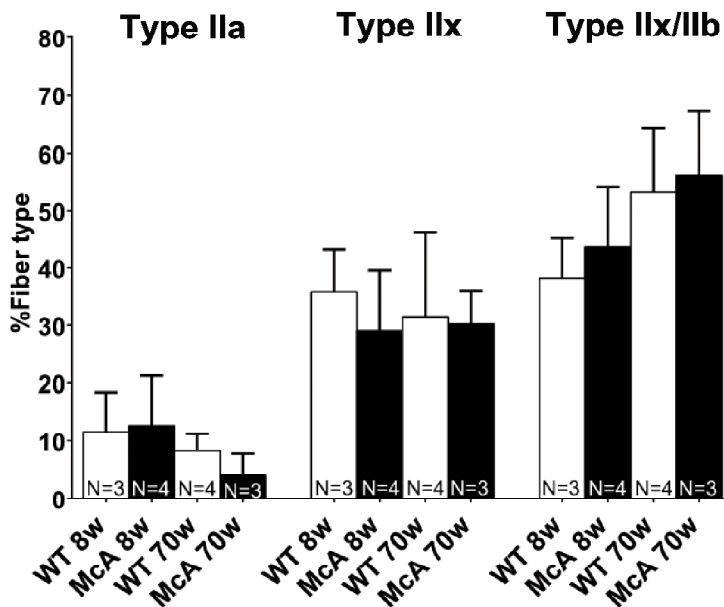

Supp. Fig. 5

Soleus

EDL

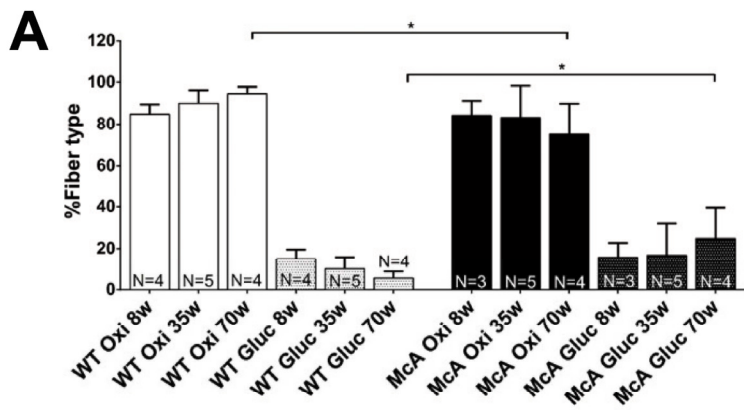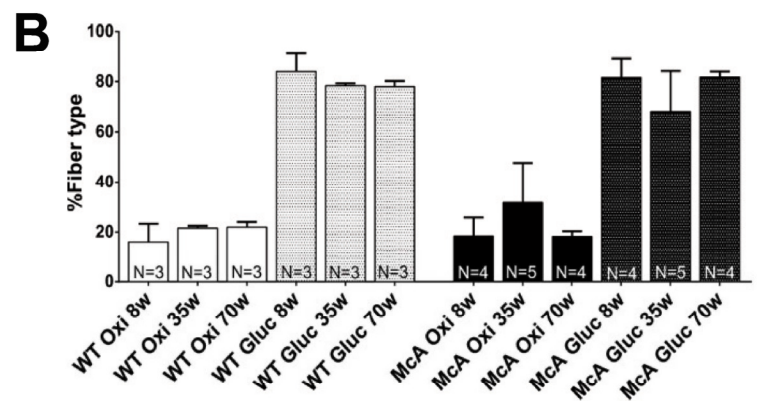

TA

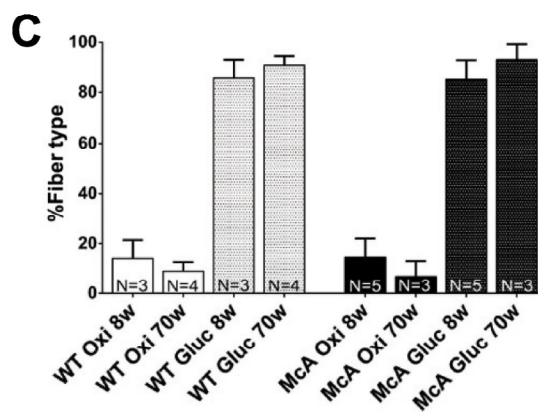

Supp. Fig 6

GASTROCNEMIUS

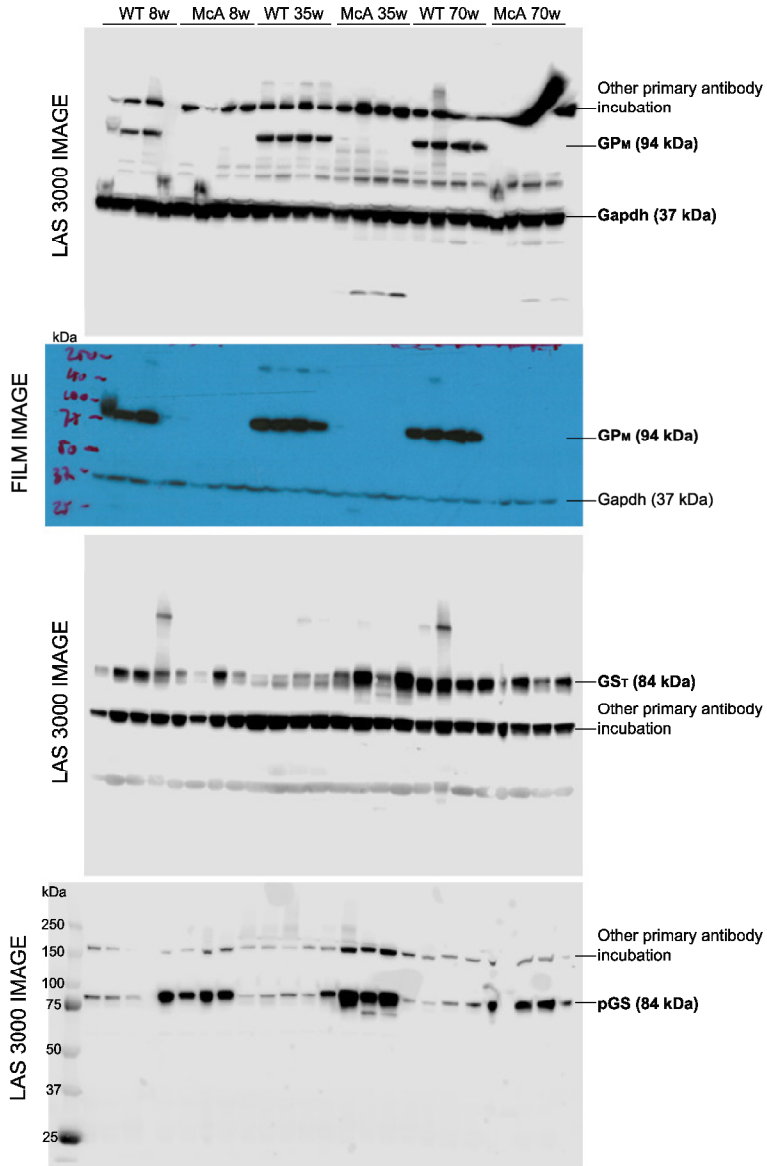

TA

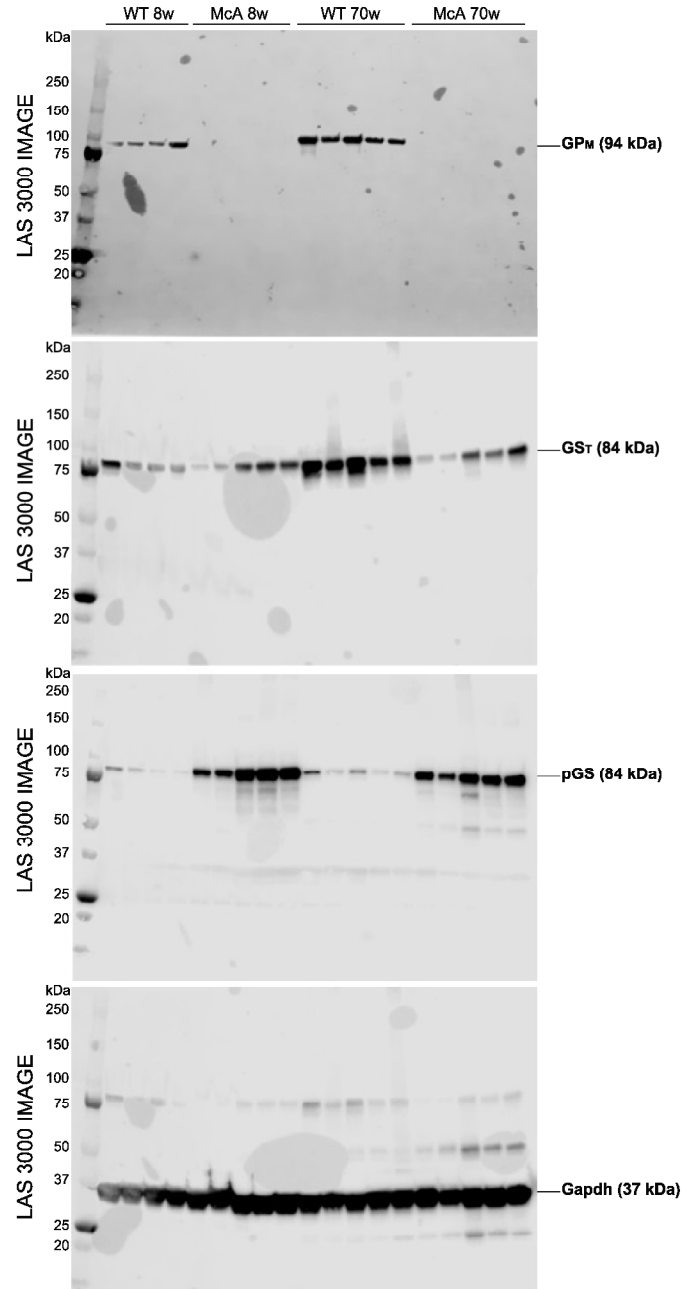

## Supp. Table

| Primary antibody |                                      |          |                        | Secondary antibody                       |          |                        | Application |
|------------------|--------------------------------------|----------|------------------------|------------------------------------------|----------|------------------------|-------------|
| ID               | Reference                            | Dilution | Diluent                | ID                                       | Dilution | Diluent                |             |
| Laminin          | (MA1-06100/Thermo-Scientific)        | 1/300    | PBS 1x+3% FCS          | Goat to Rat Ig H+L (AF 594 nm)           | 1/500    | PBS 1x+3% FCS          | IF          |
| Fibronectin      | (ab2413/Abcam)                       | 1/200    | PBS 1x+3% FCS          | Goat to Rabbit Ig H+L (AF 488 nm)        | 1/500    | PBS 1x+3% FCS          | IF          |
| Collagen IV      | (ab/Abcam)                           | 1/200    | PBS 1x+3% FCS          | Goat to Rabbit Ig H+L (AF 488 nm)        | 1/500    | PBS 1x+3% FCS          | IF          |
| MHC I            | (BA-D5/DSHB)                         | 1/20     | PBS 1x+3% FCS          | Goat to Mouse Ig $\gamma$ 2b (AF 488 nm) | 1/500    | PBS 1x+3% FCS          | IF          |
| MHC IIa          | (SC-71/DSHB)                         | 1/20     | PBS 1x+3% FCS          | Goat to Mouse Ig $\gamma$ 1 (AF 594 nm)  | 1/500    | PBS 1x+3% FCS          | IF          |
| MHC IIx          | (SAB2104768/Sigma-Aldrich)           | 1/100    | PBS 1x+3% FCS          | Goat to Rabbit Ig H+L (AF 488 nm)        | 1/500    | PBS 1x+3% FCS          | IF          |
| MHC IIb          | (BF-F3/DSHB)                         | 1/30     | PBS 1x+3% FCS          | Goat to Mouse Ig M (AF 594 nm)           | 1/500    | PBS 1x+3% FCS          | IF          |
| MHCe             | (F1.652/DSHB)                        | 1/6      | PBS 1x+3% FCS          | Goat to Mouse Ig $\gamma$ 1 (AF 594 nm)  | 1/500    | PBS 1x+3% FCS          | IF          |
| CD 68            | (ab955/Abcam)                        | 1/200    | PBS 1x+3% FCS          | Goat to Mouse Ig $\gamma$ 1 (AF 594 nm)  | 1/500    | PBS 1x+3% FCS          | IF          |
| PYGM             | From Andrea Martinuzzi               | 1/2000   | TTBS 0,1%+5% Skim milk | Donkey to Goat HRP (SCT sc-2020)         | 1/5000   | TTBS 0,1%+5% Skim milk | WB          |
| GYS-1            | (07/2015/Cell Signalling Technology) | 1/1000   | TTBS 0,1%+5% Skim milk | Goat to Rabbit HRP (Dako P0448)          | 1/5000   | TTBS 0,1%+5% Skim milk | WB          |
| p-GYS-1 Ser 641  | (07/2015/Cell Signalling Technology) | 1/1000   | TTBS 0,1%+5% Skim milk | Goat to Rabbit HRP (Dako P0448)          | 1/5000   | TTBS 0,1%+5% Skim milk | WB          |
| GAPDH            | (AM 4300/Ambion)                     | 1/10000  | TTBS 0,1%+5% Skim milk | Rabbit to Mouse HRP (Dako P0260)         | 1/7000   | TTBS 0,1%+5% Skim milk | WB          |
| GAA              | (ab102815/Abcam)                     | 1/1000   | TTBS 0,1%+5% Skim milk | Goat to Rabbit HRP (Dako P0448)          | 1/5000   | TTBS 0,1%+5% Skim milk | WB          |



## Legends:

**Supplementary Figure 1.** H&E staining of *extensor digitorum longus* (EDL) muscle from 8, 35 and 70-week-old McArdle (McA) mice. All scale bars correspond to 150  $\mu\text{m}$ . A clear increase in interstitial space is observed in 70-week-old McA mice.

**Supplementary Figure 2.** A) Fibrosis quantification in *tibialis anterior* (TA) muscle using laminin, collagen IV (Col IV) and fibronectin (FBN) staining. Fibrosis was quantified as the percentage of laminin, Col IV and FBN staining in a given muscle area. In each column the percentage of staining was calculated for muscle areas ranging from 1354737 (minimum) to 7409553 (maximum)  $\mu\text{m}^2$ . To obtain these areas 2 to 4 different mice were used. B) Laminin-fibronectin double stainings as well as collagen (Col) I and IV single staining in *extensor digitorum longus* (EDL), *quadriceps* and *soleus* of McA mice. All scale bars correspond to 150  $\mu\text{m}$

**Supplementary Figure 3.** Number of peripheral nuclei (PN) surrounding the sarcoplasmic membrane per muscle fiber. In each column 490 (minimum) to 1265 (maximum) fibers were counted (median 909 fibers). The non-parametric Kruskal-Wallis *One-Way ANOVA* with multiple comparisons test (*Dunn's test*) was used for statistical analyses. Symbols: \*  $p < 0.05$ .

**Supplementary Figure 4.** A) Percentage of type I and IIa fibers in the *soleus*. In each column between 223 (minimum) and 980 (maximum) fibers were counted (median 612 fibers). B) Percentage of type IIa, IIx and IIx/IIb fibers in the EDL muscle. In each column between 177 (minimum) and 651 (maximum) fibers were counted (median 413 fibers). C) Percentage of type IIa, IIx and IIx/IIb fibers in TA muscle. In each column between 50 (minimum) and 930 (maximum) fibers were counted (median 520 fibers) of each column indicates the number of mice used to calculate the mean values. The N at the bottom of each column represents the number of mice used to calculate the mean

values. Error bars correspond to SD. The non-parametric Kruskal-Wallis *One-Way ANOVA* with multiple comparisons test (*Dunn's test*) was used for statistical analyses. Symbols: \*  $p < 0.05$ .

**Supplementary Figure 5.** A), B) and B) Percentage of oxidative (type I+IIa+I/IIa) and glycolytic (IIa/IIx+IIa+IIx+IIx/IIb) fibers in 8, 35 and 70-week-old wild-type (WT) and McArdle (McA) mice in *soleus*, EDL and *tibialis anterior* (TA), respectively. The N at the bottom of each column represents the number of mice used to calculate the mean values. Error bars correspond to SD. The non-parametric Kruskal-Wallis *One-Way ANOVA* with multiple comparisons test (*Dunn's test*) was used for statistical analyses. Symbols: \*  $p < 0.05$ .

**Supplementary Figure 6.** Uncropped original western blot images for GP<sub>M</sub>, GS<sub>T</sub>, pGS and Gapdh in *gastrocnemius* and *tibialis anterior* (TA) muscles.

**Supplementary Table. List of antibodies.** Abbreviations. FCS: Fetal Calf Serum; IF: Immunofluorescence; PBS: Phosphate buffered saline; TTBS: Tween-Tris buffered saline; WB: Western blot.
